# Supplementary material for: The mutational profile in a South African cohort with inherited neuropathies and spastic paraplegia
Source: PubMed Central journal article supplement (PMC10497947; doi:10.3389/fneur.2023.1239725), 2023-08-29

Supplementary figure 1. Integrative Genomics Viewer (IGV) screenshots and Sanger sequencing chromatograms for GN and HSP variants reported in manuscript tables 2 and 3.

A. fam\_006 GRCh38 g.11998786 A>G (het) *MFN2* NP\_055689.1:p.Thr206Ala

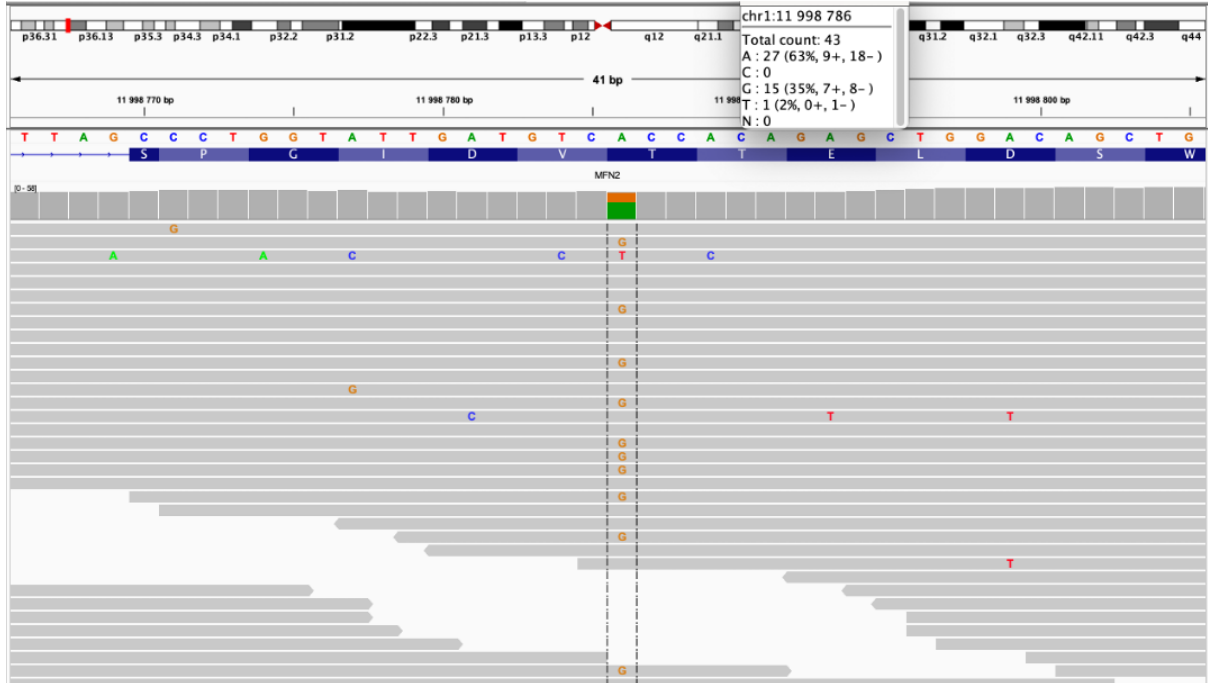

B. fam\_081 GRCh38 g.11999054 C>T (het) *MFN2* NP\_055689.1:p.Arg259Cys

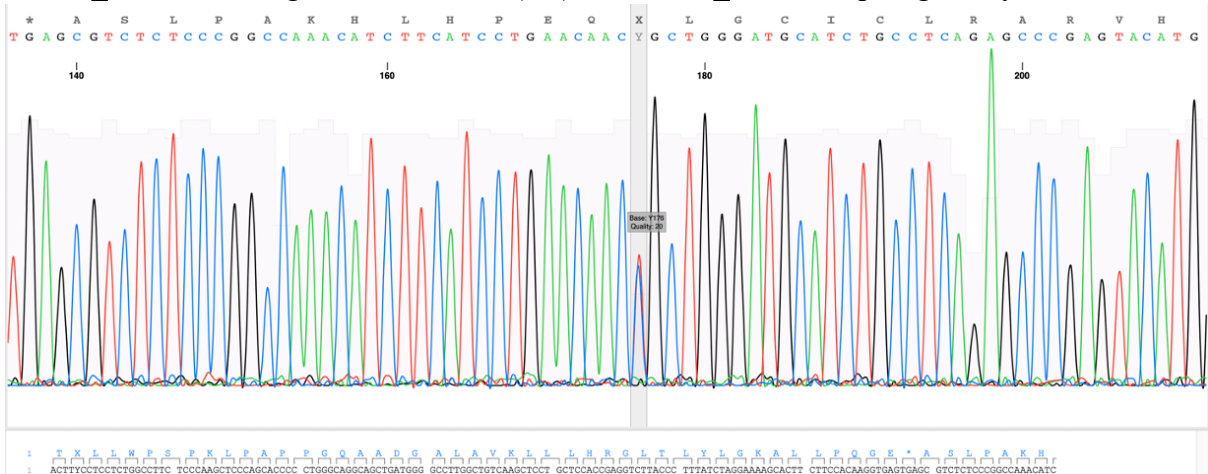

C. fam\_083 GRCh38 g.12001423 G>A (het) *MFN2* NP\_055689.1:p.Arg280His

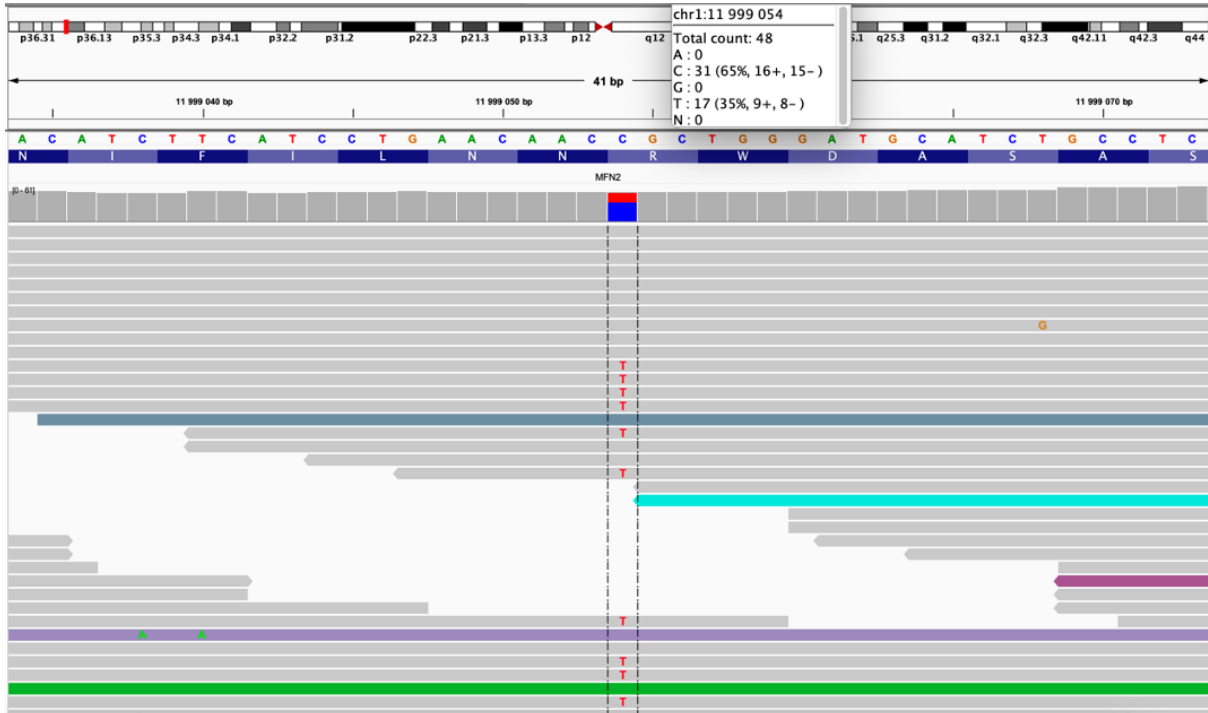

D. ICGNMD\_18 GRCh38 g.30941503 G>A (het) *MORC2* NP\_001290185.1:p.Arg252Trp

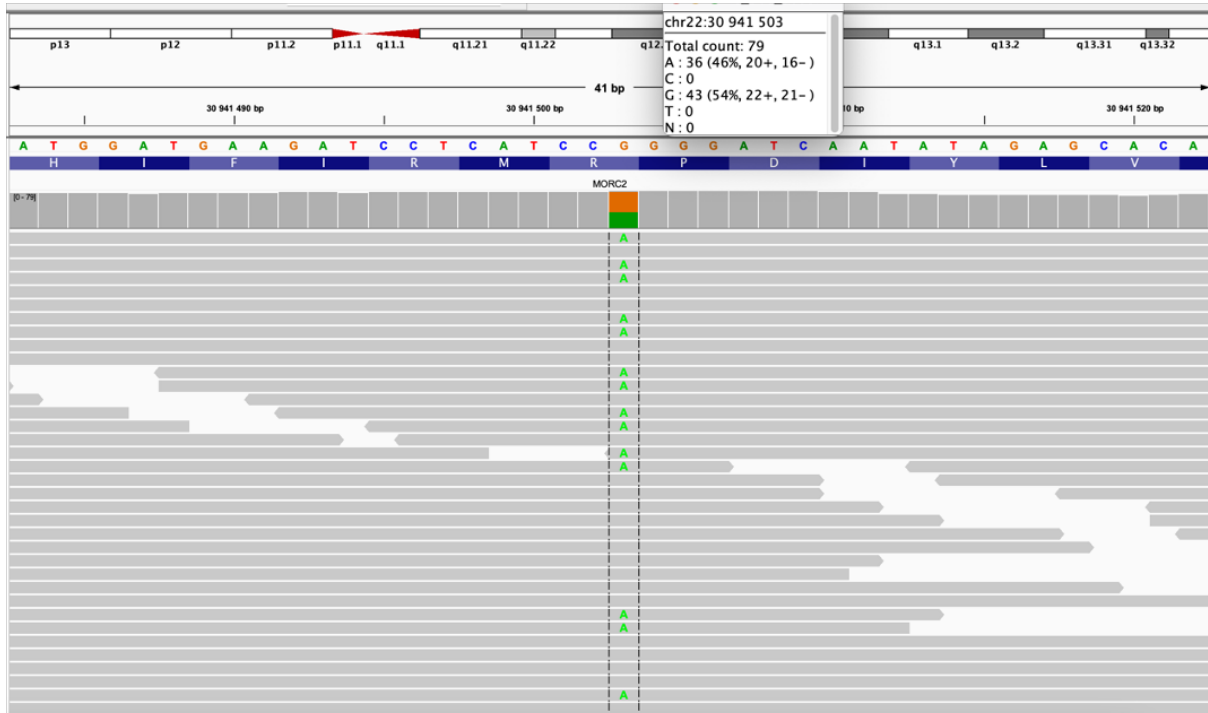

E. ICGNMD\_16 GRCh38 g.116395224 T>C (het) *ATP1A1* NP\_000692.2:p.Ile592Thr

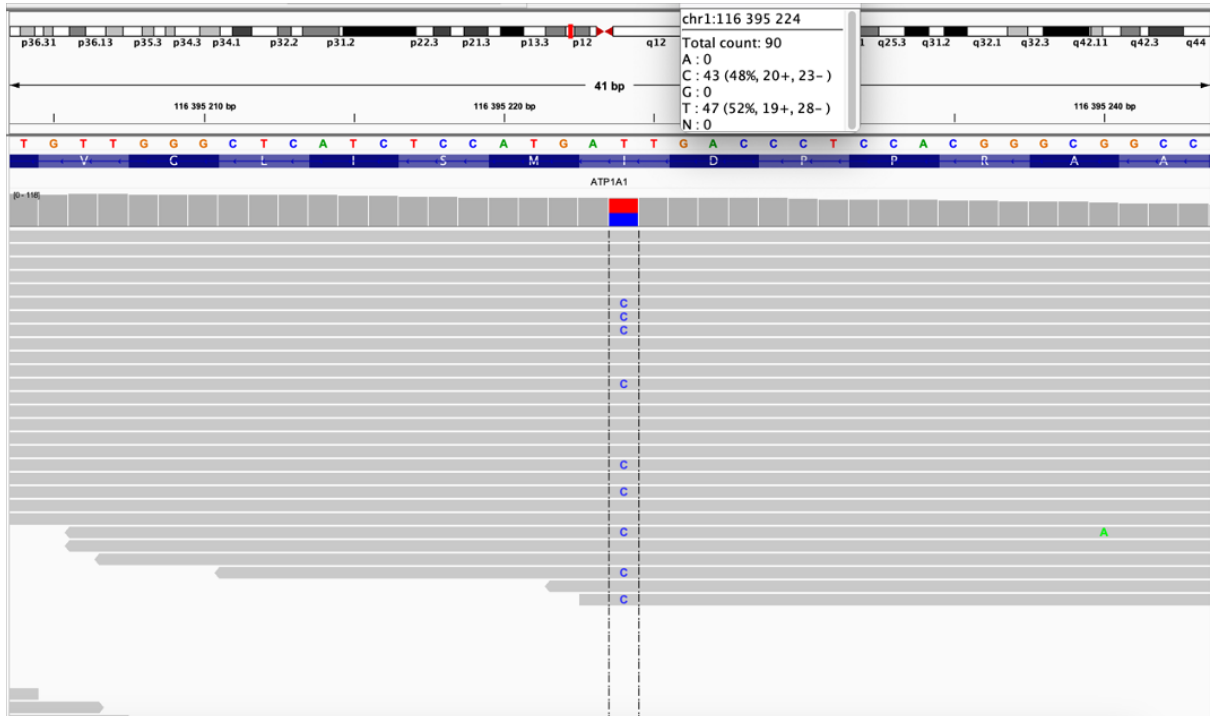

F. ICGNMD\_59 GRCh38 g.71223771 C>T (het) *GJB1* NP\_000157.1:p.Arg22Ter

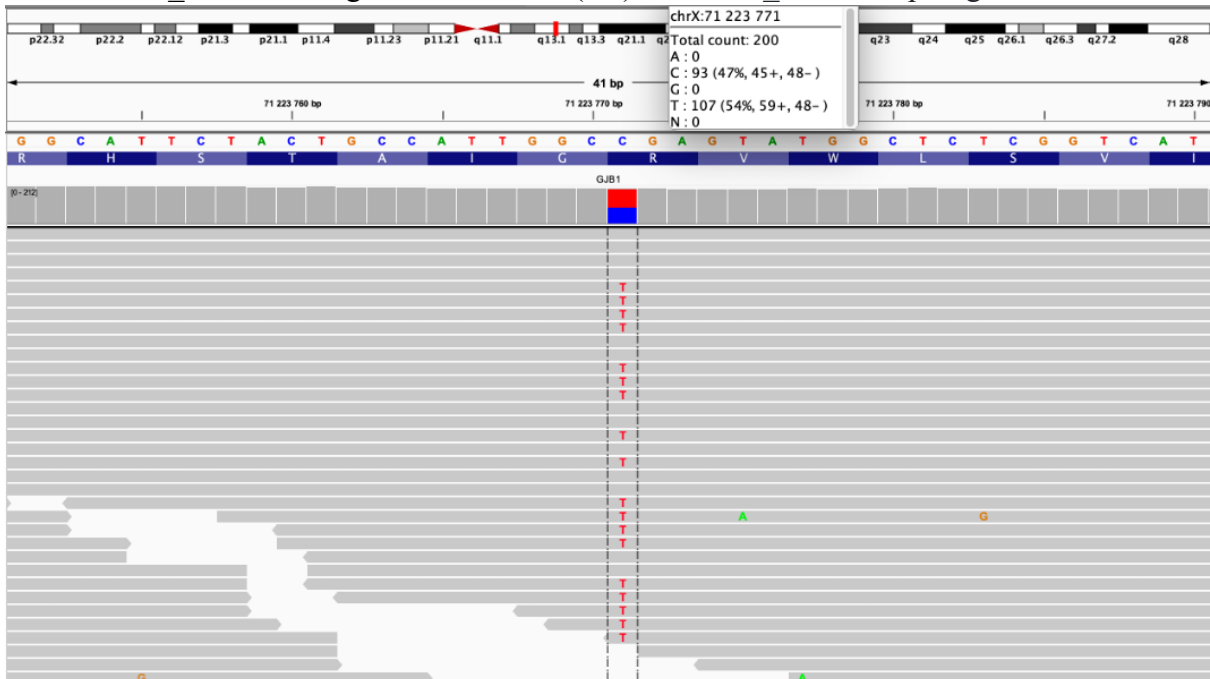

G. ICGNMD\_17 GRCh38 g.36093298 T>G (hom) *ADPRS* NP\_060295.1:p.Val335Gly

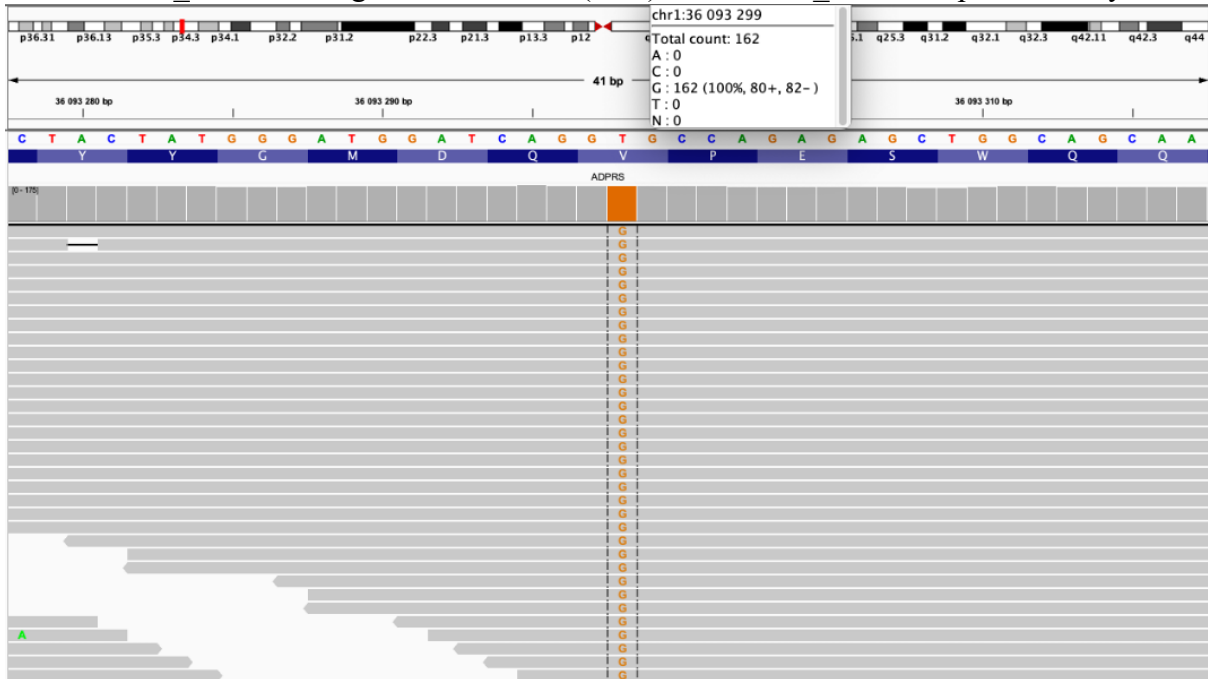

H. ICGNMD\_4 GRCh38 g.108301698 C>T (hom) *ATM* NP\_000042.3:p.Thr1743Ile

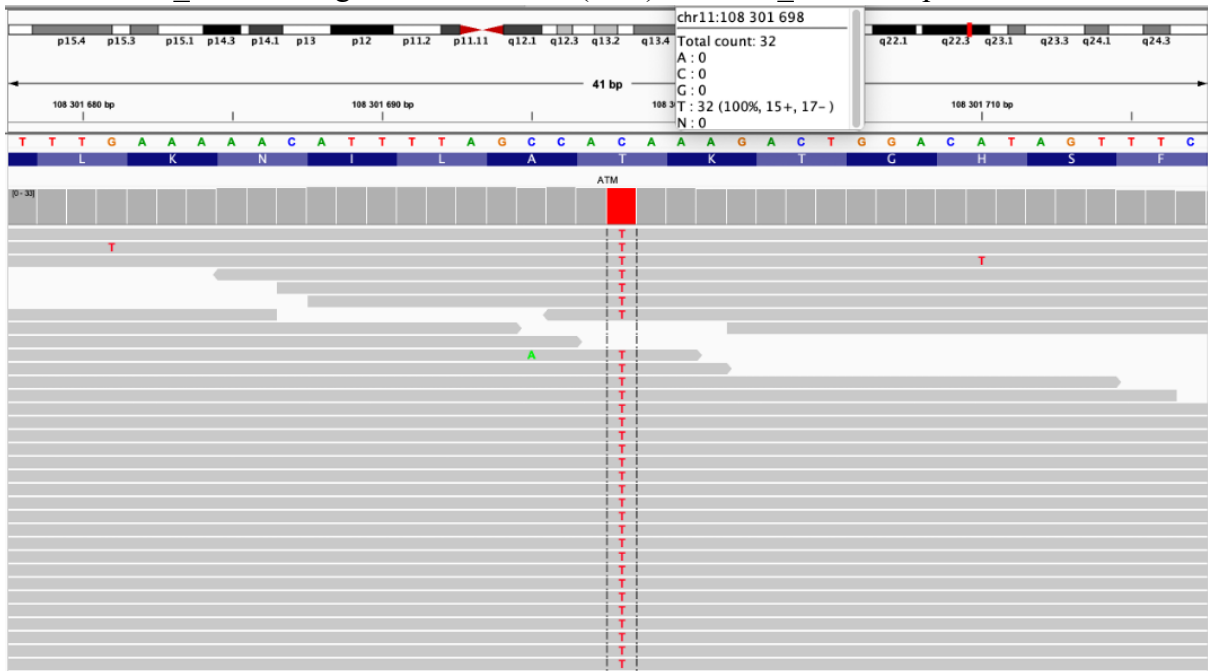



J. i. ICGNMD\_6 GRCh38 g.161307280 T>C (het) *MPZ* NP\_000521.2:p.Glu71Gly

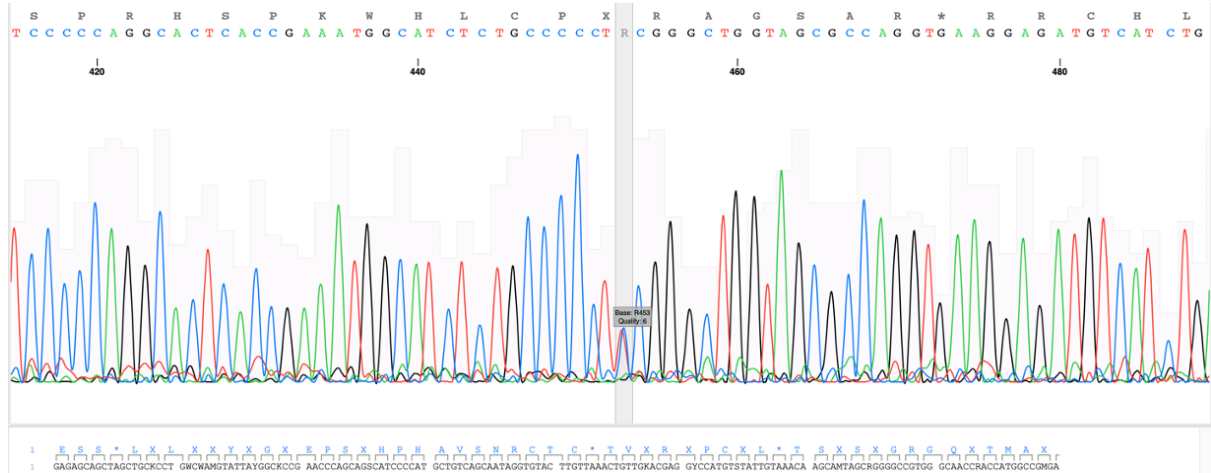

ii. Affected mother of ICGNMD\_6 GRCh38 g.161307280 T>C (het) *MPZ* NP\_000521.2:p.Glu71Gly

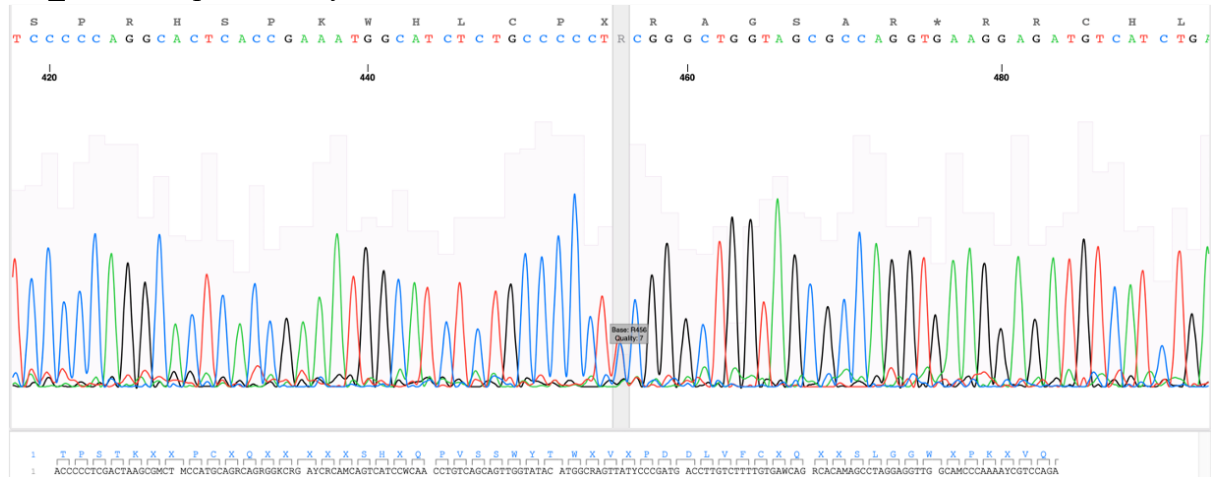

iii. Affected brother of ICGNMD\_6 GRCh38 g.161307280 T>C (het) *MPZ* NP\_000521.2:p.Glu71Gly

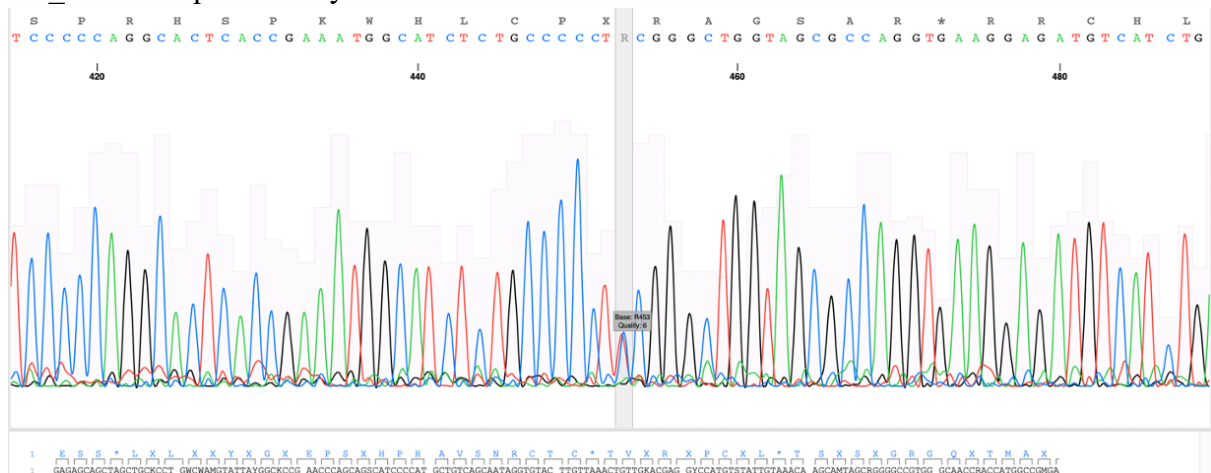



iii. ICGNMD\_9 GRCh38 g.27313074 G>A (het) *MPV17* NP\_002428.1:p.Gln36Ter

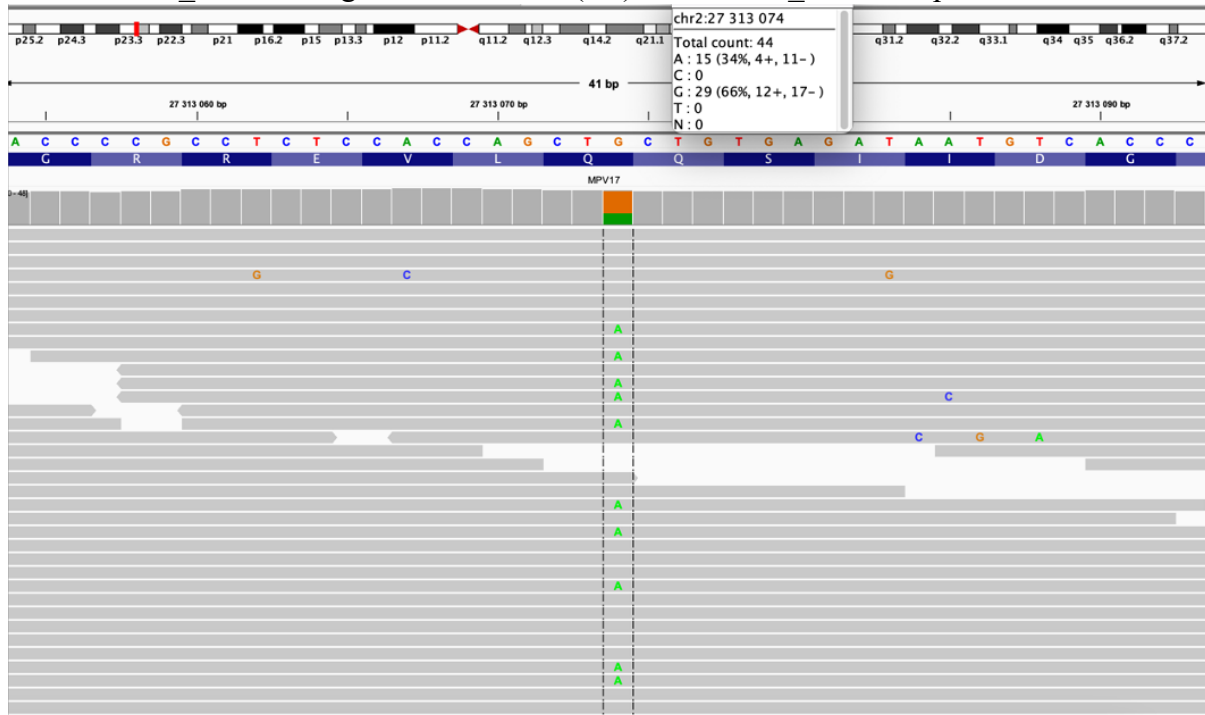

L. i. fam\_007 GRCh38 g.27312496 G>A (het) *MPV17* NP\_002428.1:p.Arg125Trp

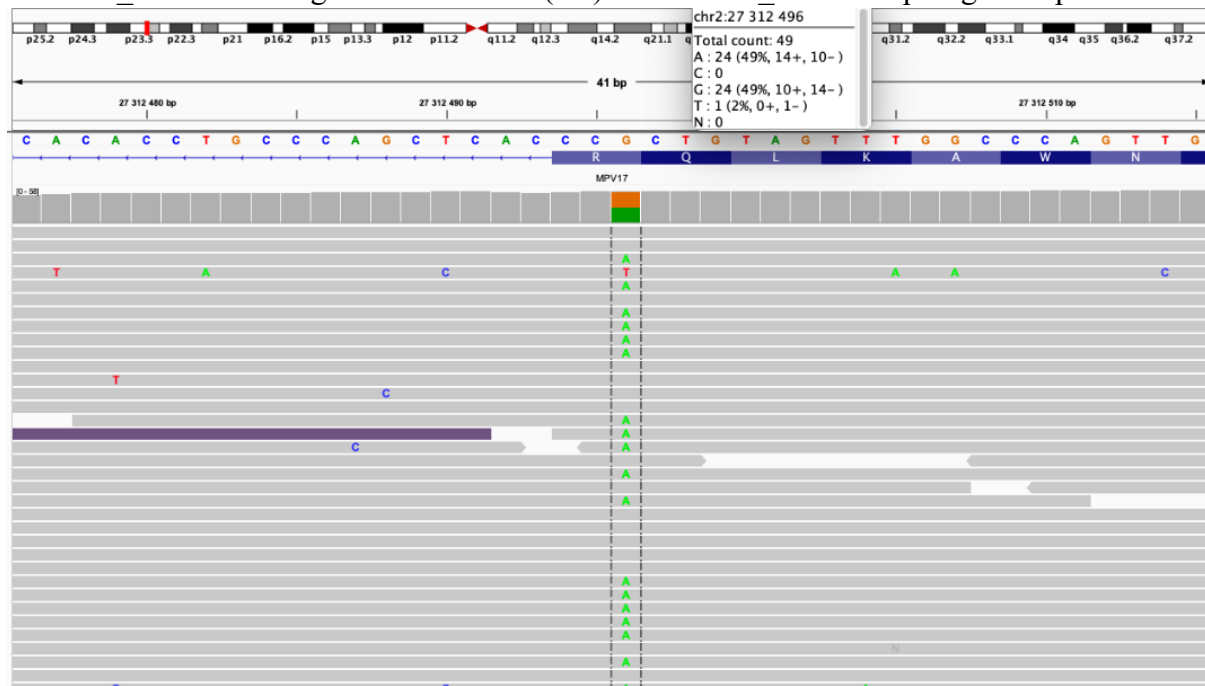



ii. ICGNMD\_7 GRCh38 g.27312496 G>A (het) *MPV17* NP\_002428.1:p.Arg125Trp

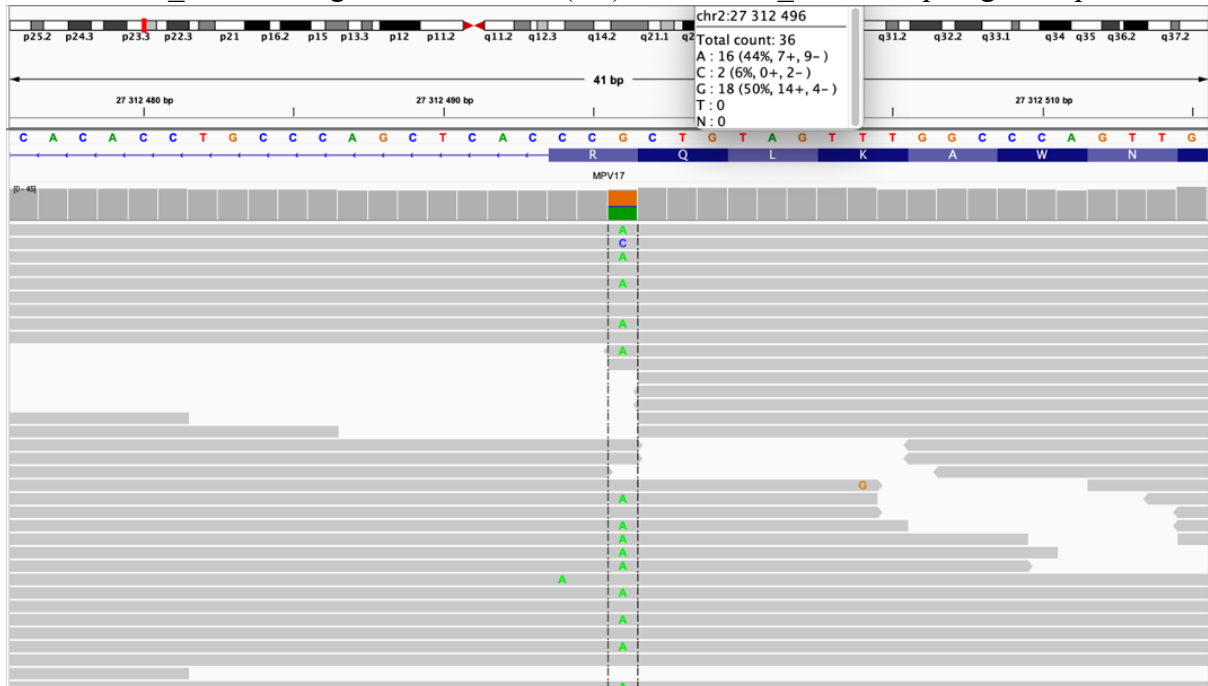

iii. ICGNMD\_9 GRCh38 g.27312496 G>A (het) *MPV17* NP\_002428.1:p.Arg125Trp

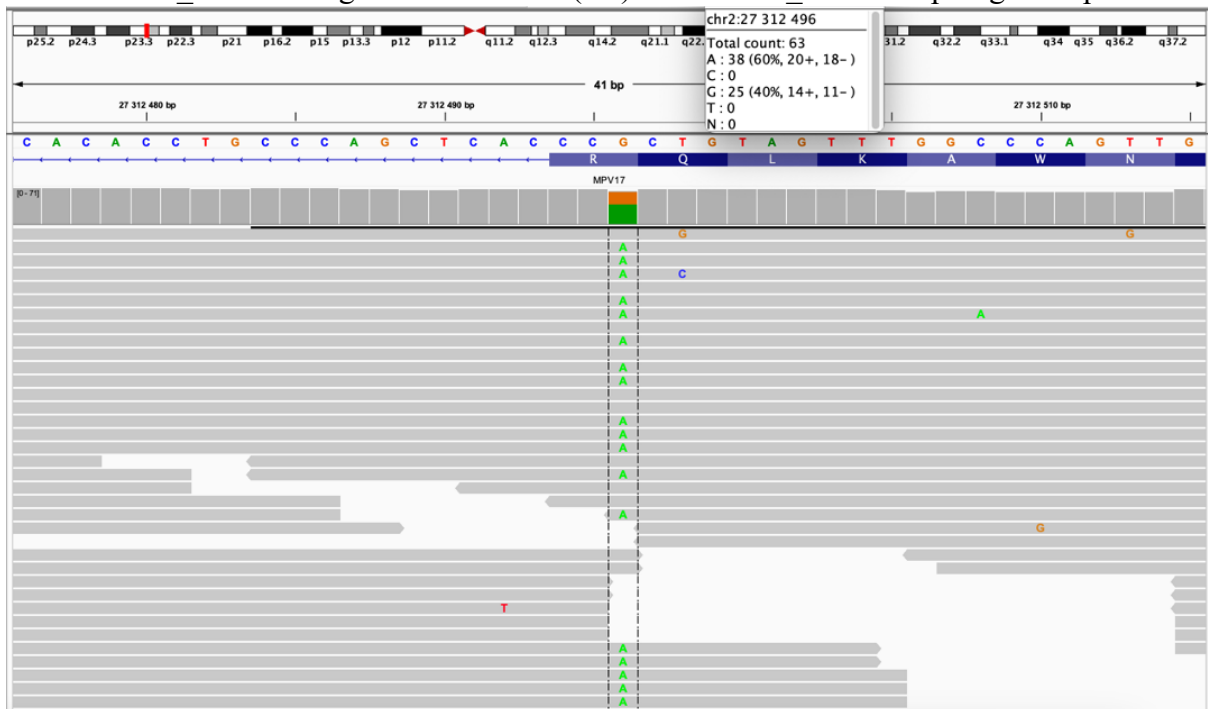

M. i. fam\_001 GRCh38 g.240783773 G>T (het) *KIF1A* NP\_001230937.1:p.Ala255Asp

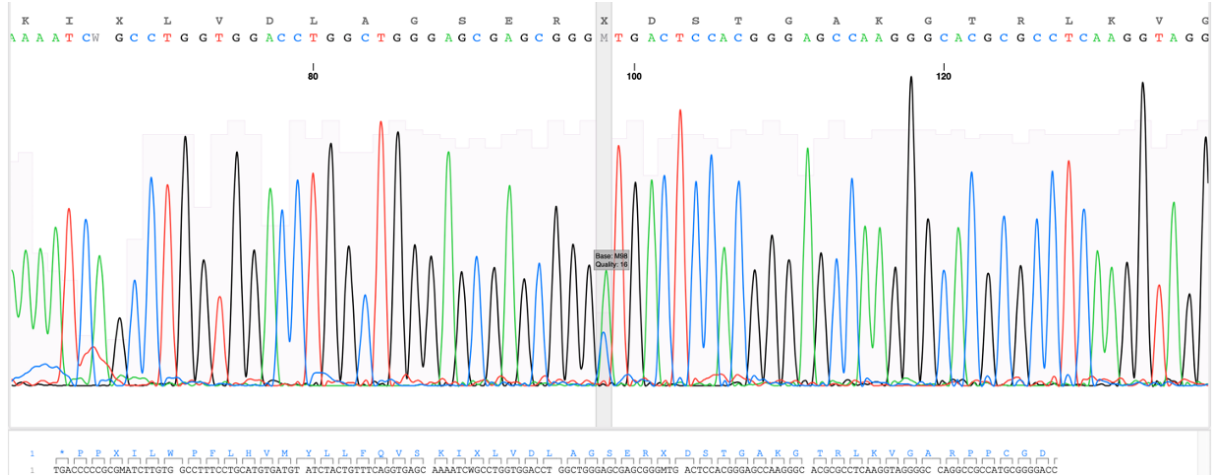

ii. Affected daughter of fam\_001 GRCh38 g.240783773 G>T (het) *KIF1A* NP\_001230937.1:p.Ala255Asp

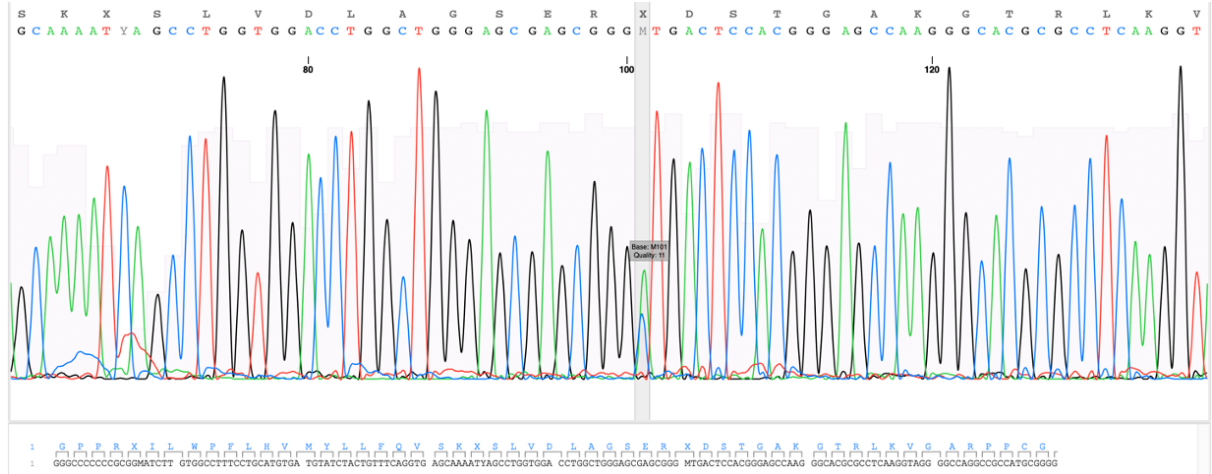





R. ICGNMD\_49 GRCh38 g.89546737 C>T (hom) *SPG7* NP\_003110.1:p.Ala510Val

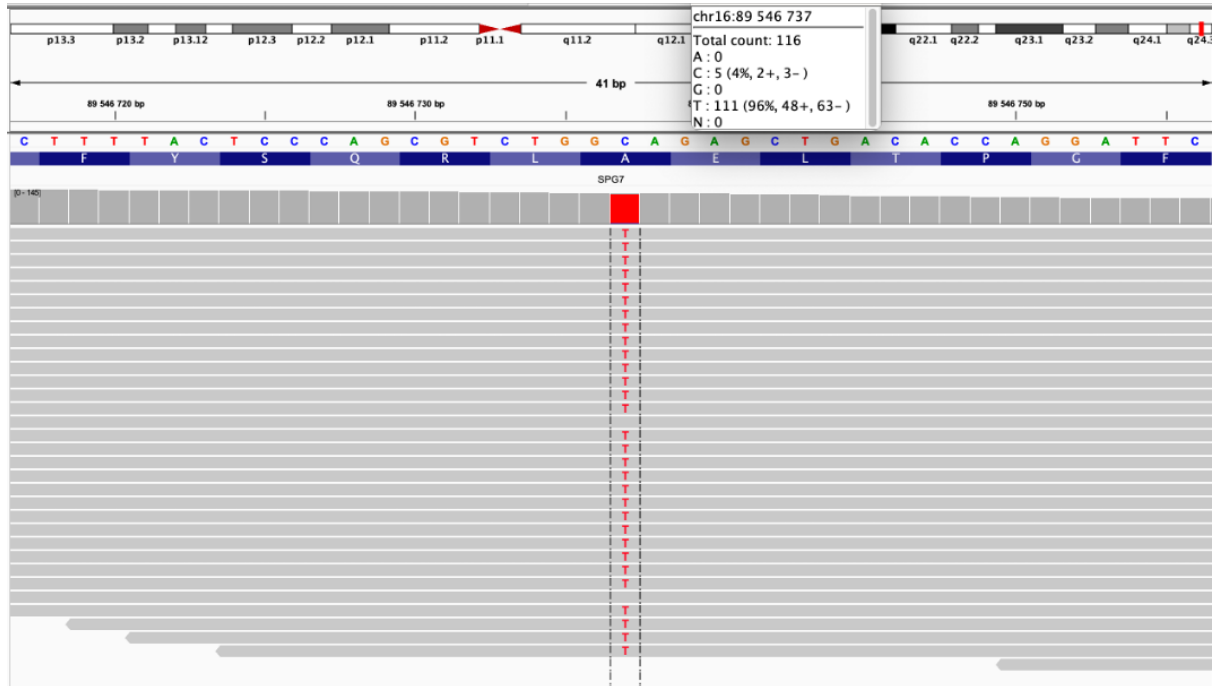

S. i. ICGNMD\_22 GRCh38 g.44574917CAGA (het) *SPG11* NP\_079413.3:p.Leu1997MetfsTer60

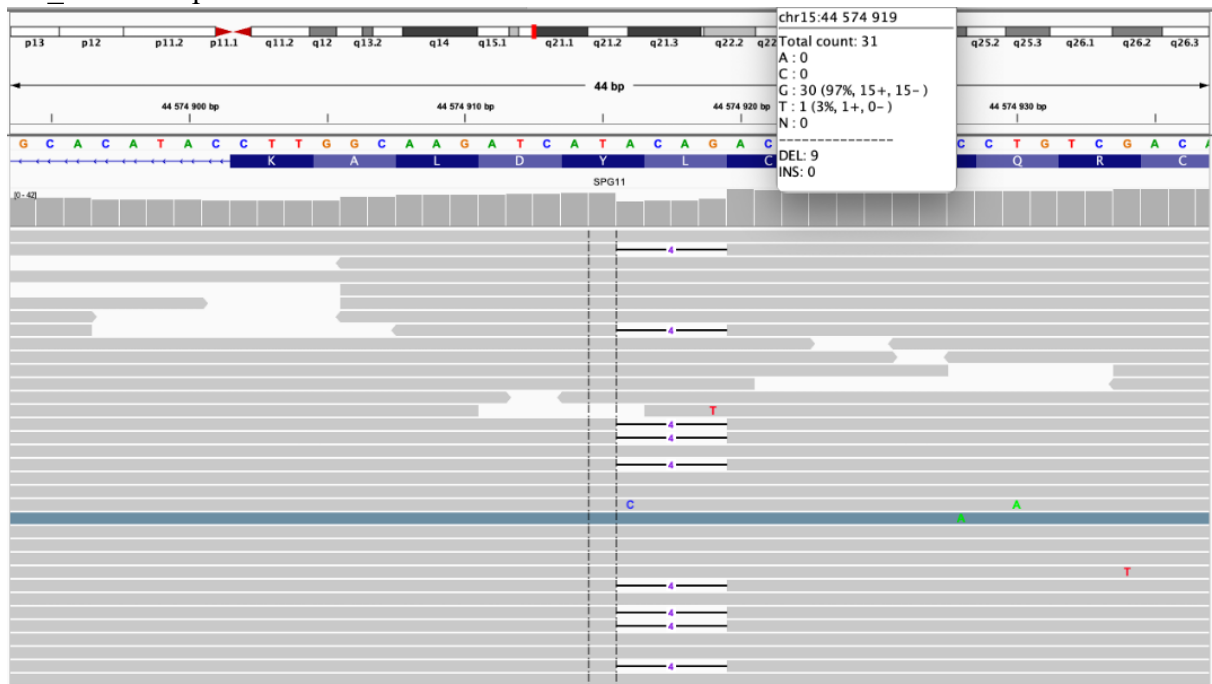



U. fam\_009 GRCh38 g.44651634 A>G (hom) *SPG11* NP\_079413.3:p.Leu438Pro

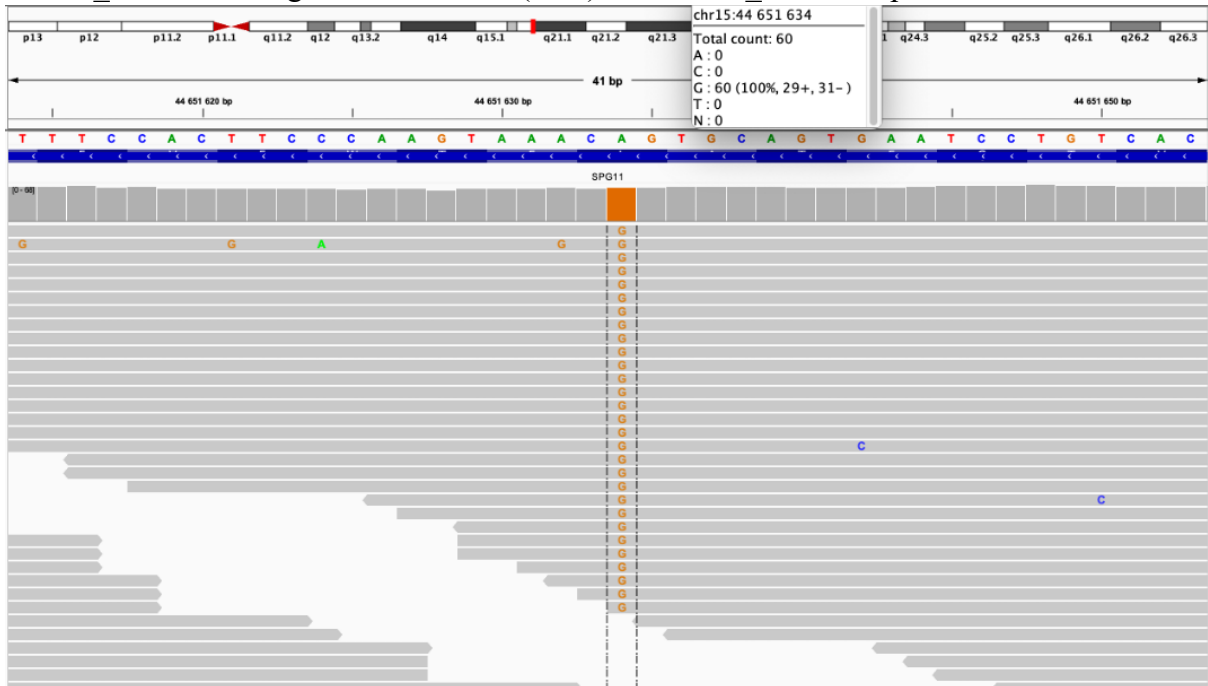

V. ICGNMD\_8 GRCh382 g.53092049 C>T (hom) *RFT1* NP\_443091.1:p.Gly494Ser

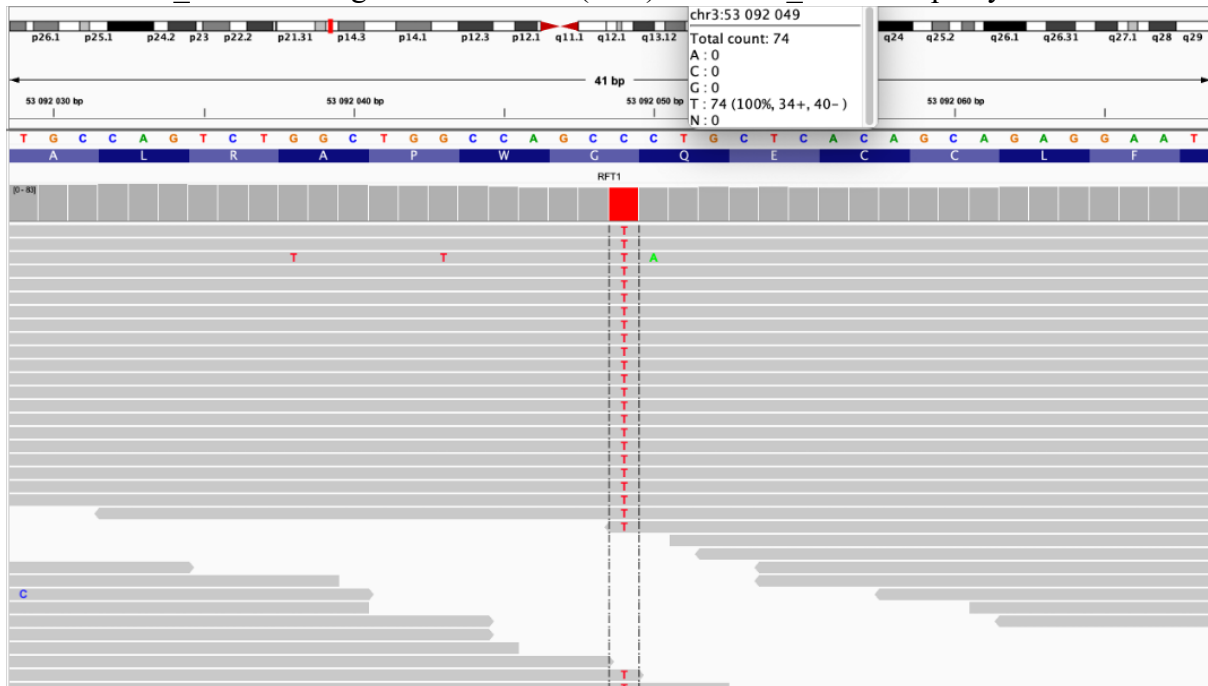





ii. fam\_122 GRCh38 g.64615229 T>A (het) *CYP7B1* p.His285Leu

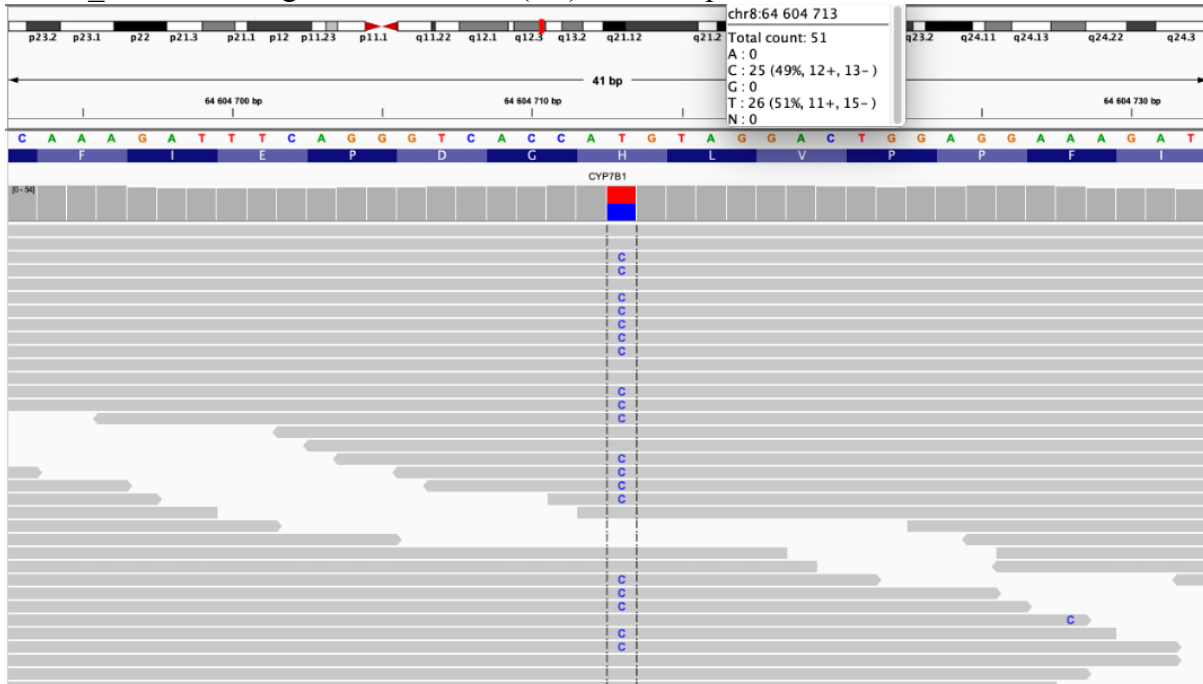

Y. fam\_142 GRCh38 g.95628493 C>G (het) *ALDH18A1* NM\_002860.4:c.809-1G>C

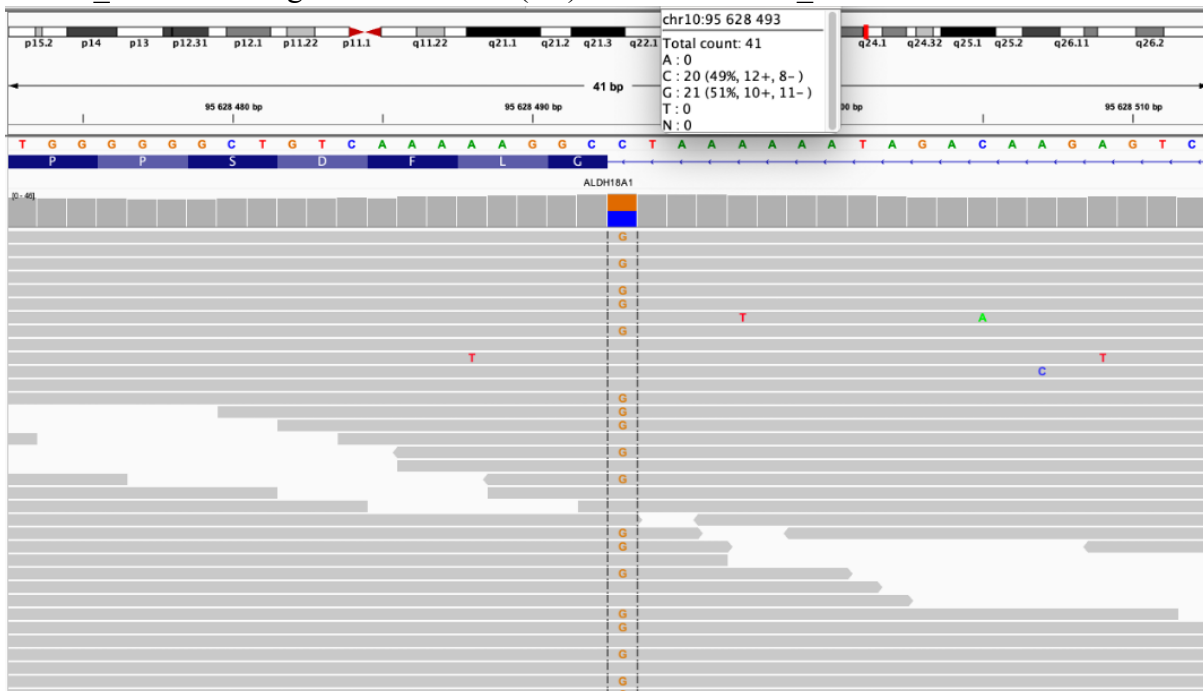

Supplement: Image_1.pdf [file Image_1.pdf]
